# Supplementary material for: Cobalt supported on carbon nanotubes for methane chemical vapor deposition for the production of new carbon nanotubes
Source: Royal Society of Chemistry journal article supplement (doi:10.1039/d1nj02442f), 2021-01-01
Supplement: d1nj02442f1.pdf [file d1nj02442f1.pdf]

## Supplementary information

### New Journal of Chemistry

## Carbon nanotubes as support of cobalt catalysts for methane CVD towards carbon nanotubes

Laura M. Esteves<sup>1</sup>, Hugo A. Oliveira<sup>1\*</sup>, Yutao Xing<sup>2</sup>, Fabio B. Passos<sup>1</sup>

<sup>1</sup>Departamento de Engenharia Química e de Petróleo, Universidade Federal Fluminense, Niterói, RJ, Brasil.

<sup>2</sup>Instituto de Física, Universidade Federal Fluminense, Niterói, RJ, Brasil.

\*Corresponding author: Hugo A. Oliveira – E-mail: hugoao@id.uff.br

E-mail of co-authors:

lauraesteves@id.uff.br (Laura M. Esteves)

xy@id.uff.br (Yutao Xing)

fabiopassos@id.uff.br (Fabio B. Passos)

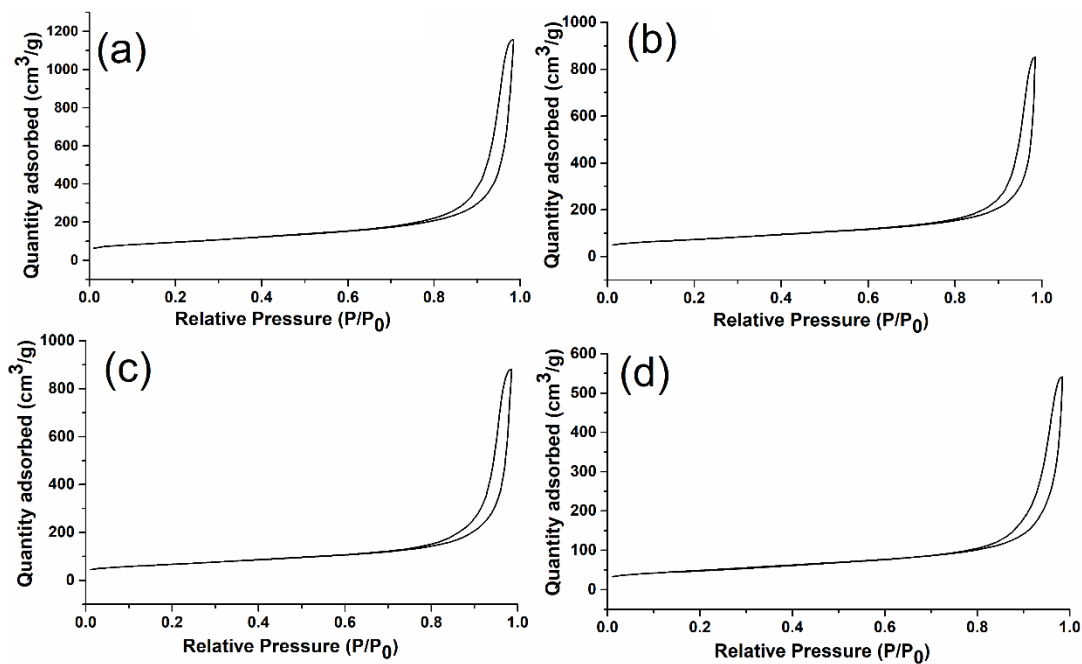

Fig. S1- N<sub>2</sub>-adsorption–desorption isotherms of Co/CNT<sub>s</sub> catalysts: (a) 10Co/CNT<sub>s</sub>\_IMP; (b) 10Co/CNT<sub>s</sub>\_WI; (c) 20Co/CNT<sub>s</sub>\_IMP and (d) 20Co/CNT<sub>s</sub>\_WI.

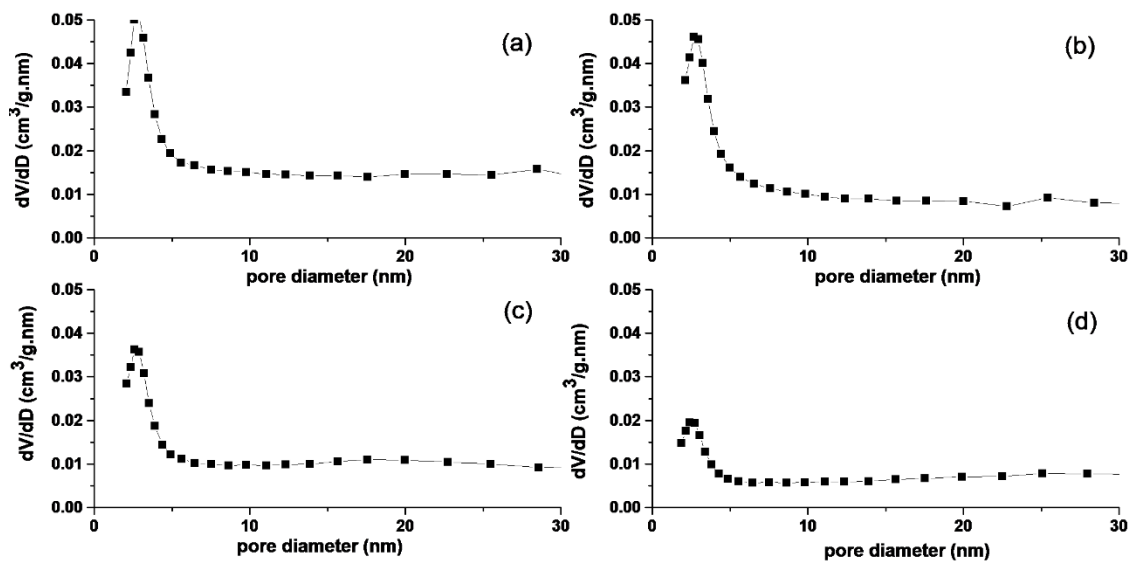

Fig. S2- Pore size distribution of Co/CNT<sub>s</sub> catalysts: (a) 10Co/CNT<sub>s</sub>\_IMP; (b) 10Co/CNT<sub>s</sub>\_WI; (c) 20Co/CNT<sub>s</sub>\_IMP and (d) 20Co/CNT<sub>s</sub>\_WI.

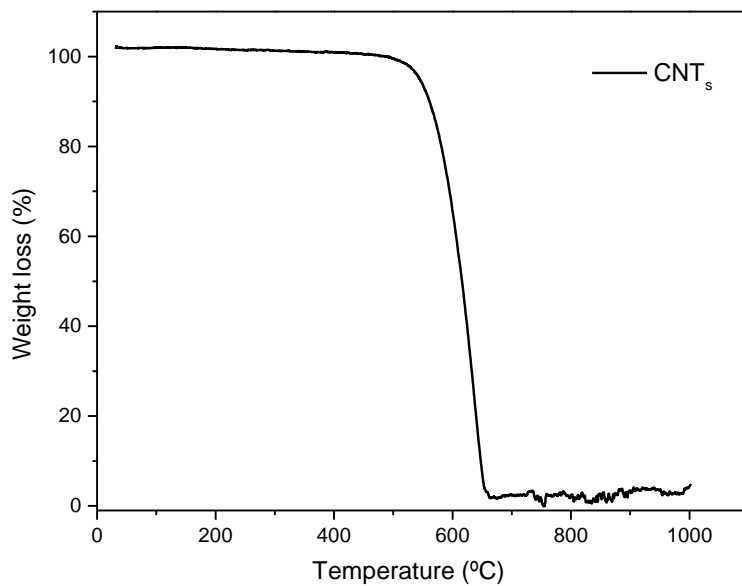

Fig. S3- TGA thermogram of CNT<sub>s</sub>

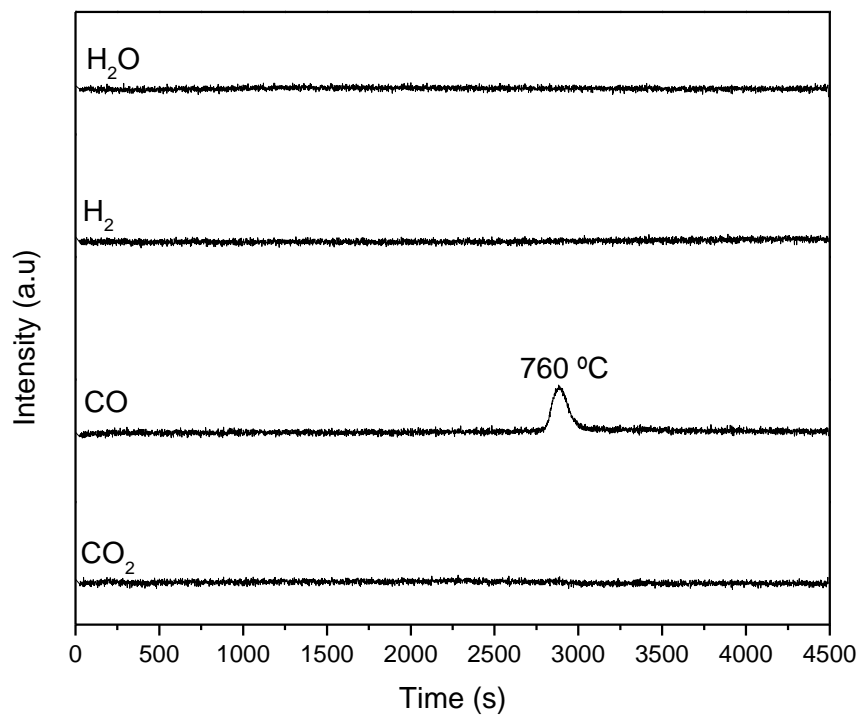

Fig. S4-Stability test of the CNT<sub>s</sub> in Helium atmosphere.

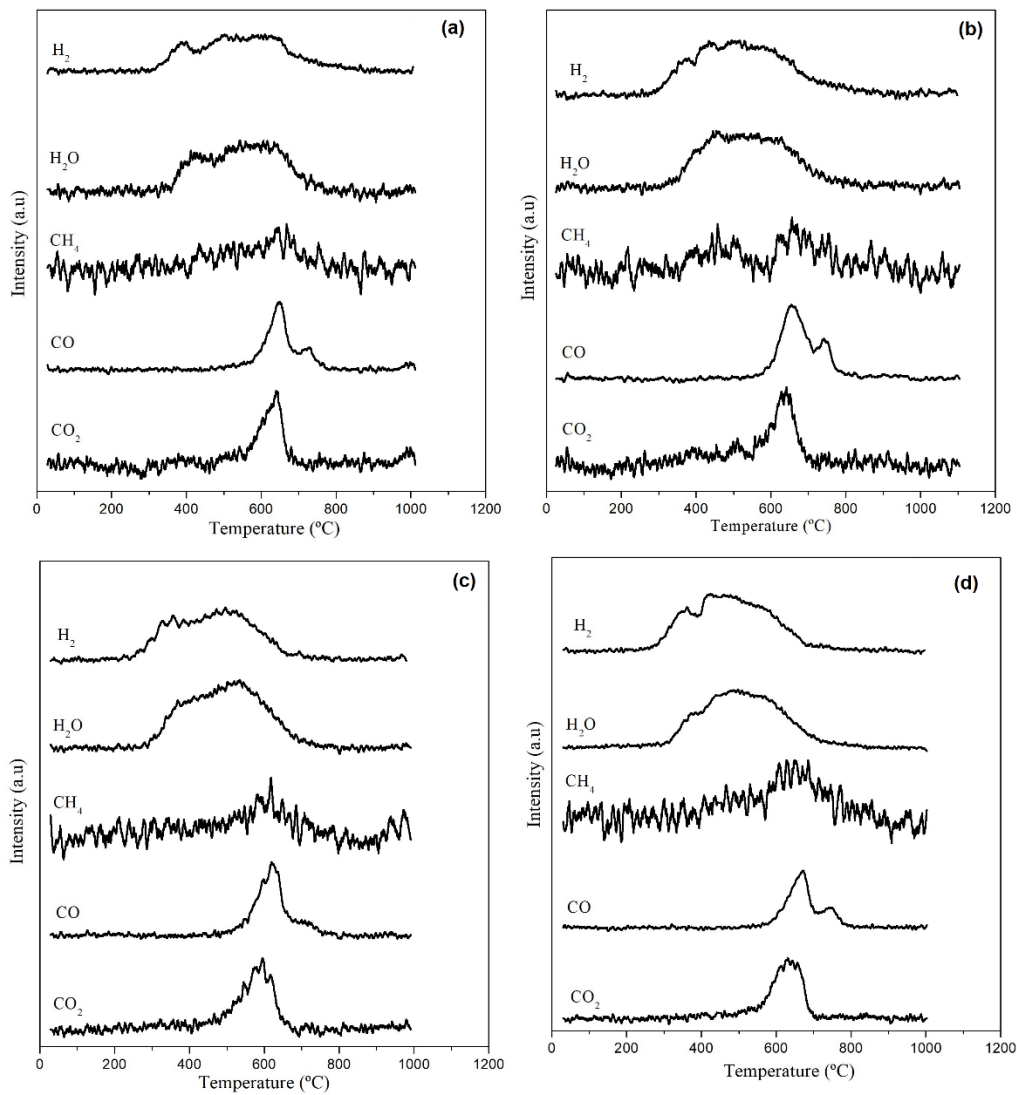

Fig. S5- Detailed TPR profiles of Co/CNT<sub>s</sub> catalysts: (a) 10Co/CNT<sub>s\_IMP</sub>; (b) 10Co/CNT<sub>s\_WI</sub>; (c) 20Co/CNT<sub>s\_IMP</sub> and (d) 20Co/CNT<sub>s\_WI</sub>. The H<sub>2</sub> profile corresponds to hydrogen consumption ( $m/q=2$ ) and the other profiles to the formation of those components ( $m/q = 16$  (CH<sub>4</sub>), 18 (H<sub>2</sub>O), 20 (CO) and 44 (CO<sub>2</sub>) signals).

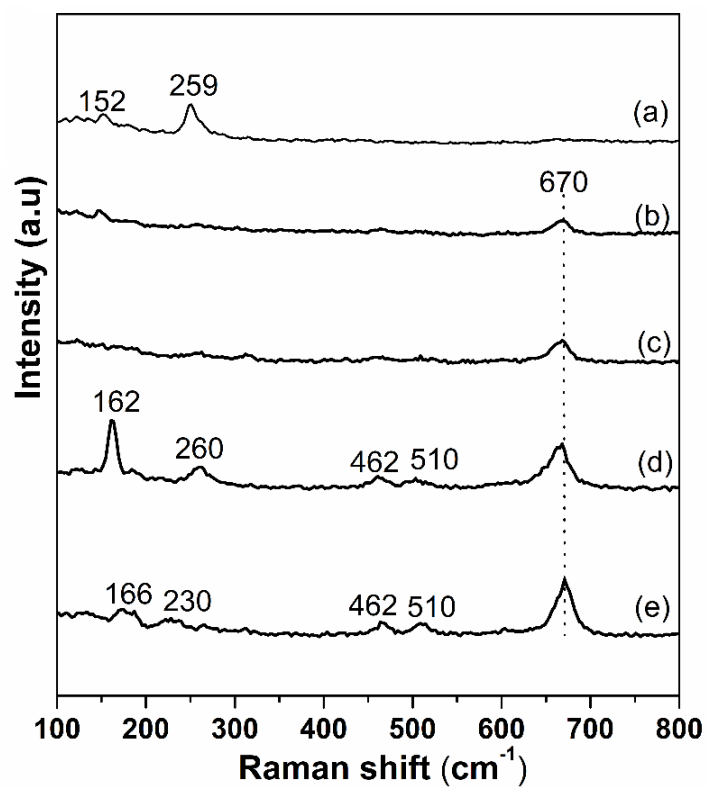

Fig. S6- Raman spectra of CNT<sub>s</sub> and Co/CNT<sub>s</sub> supported catalysts: (a) CNT<sub>s</sub>; (b) 10Co/CNT<sub>s</sub>\_IMP; (c) 10Co/CNT<sub>s</sub>\_WI; (d) 20Co/CNT<sub>s</sub>\_IMP and (e) 20Co/CNT<sub>s</sub>\_WI.

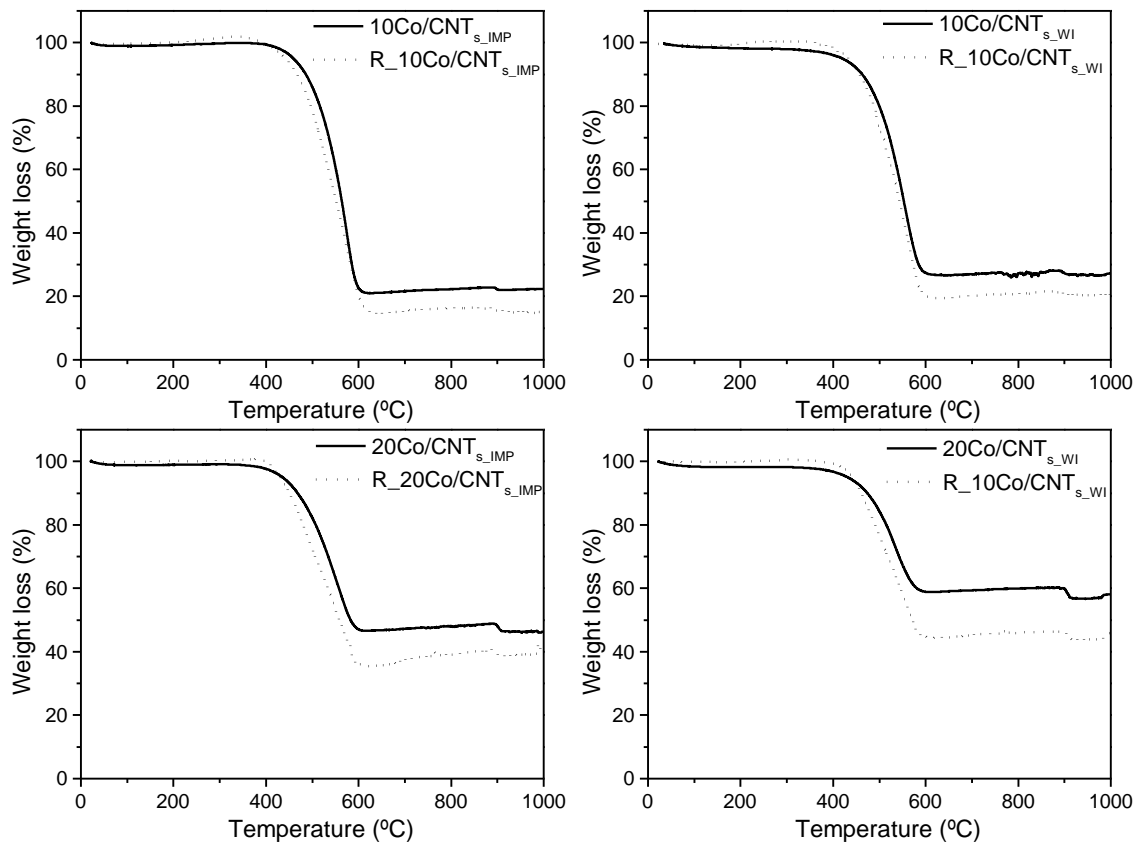

Fig. S7-TGA curves of Co/CNT<sub>s</sub> catalyst before and after methane CVD.

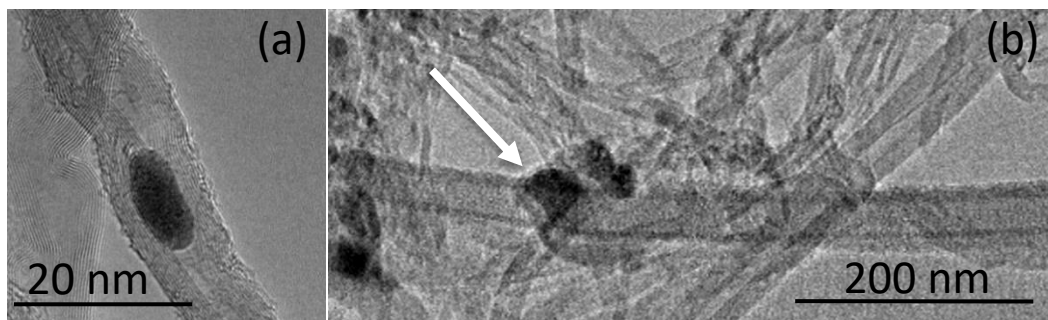

Fig. S8- TEM images: (a) Particle small than the inner diameter of the nanotube and centered along the axis of the tubes with the wall taking the same shape of the particle; (b) Particle larger than the inner diameter of the nanotube and decentralized.
